# Supplementary material for: Mitochondrial peptides modulate mitochondrial function during cellular senescence
Source: PubMed Central journal article supplement (PMC6046248; doi:10.18632/aging.101463), 2018-06-10
Supplement: aging-10-101463-s001.pdf [file aging-10-101463-s001.pdf]

## SUPPLEMENTARY MATERIAL

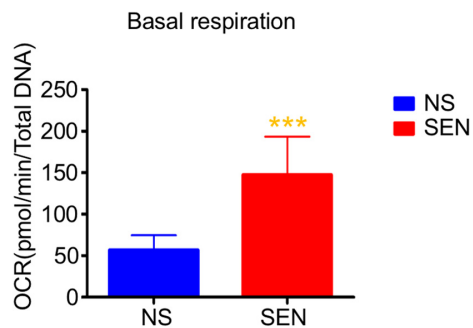

**Supplementary Figure 1. Mitochondrial respiration was increased during hydrogen peroxide-induced senescence.** Cellular oxygen consumption rate (OCR) in non-senescent and senescent cells. Data are reported as mean  $\pm$  SEM of three independent experiments. Significant differences were determined with Student's *t*-tests. \*\*\* $p < 0.001$ . Abbreviations: NS, Non-senescent cells (quiescent); SEN, Senescent cells.

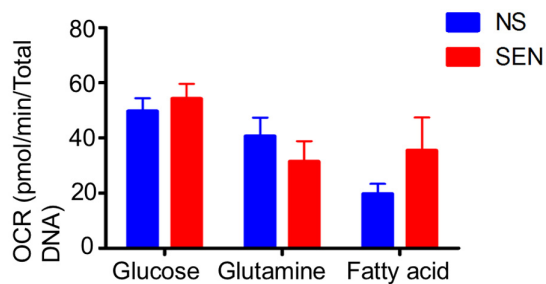

**Supplementary Figure 2. Mitochondrial fuel usage during doxorubicin-induced senescence.** Cellular oxygen consumption rate (OCR) in the presence of the inhibitors of the glucose, glutamine, and long chain fatty acid oxidation pathway in non-senescent and senescent cells (N=4).

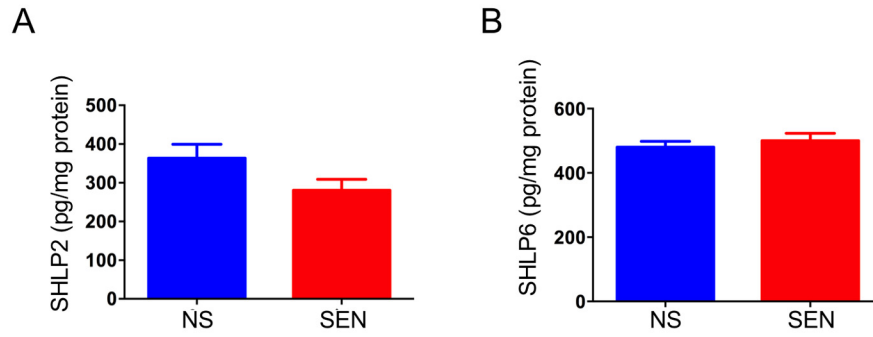

**Supplementary Figure 3. SHLP2 and SHLP6 levels are not changed during doxorubicin-induced senescent cells. (A) SHLP2 and (B) SHLP6 levels were examined in doxorubicin-induced senescence (N=3).**

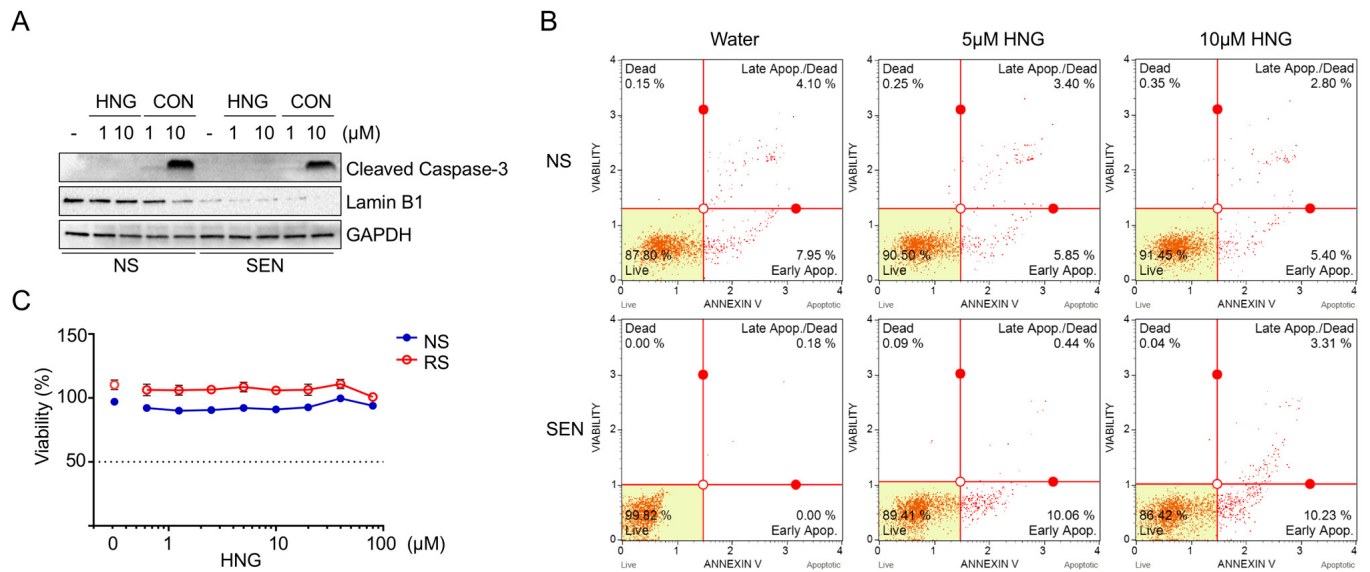

**Supplementary Figure 4. Humanin analog, HNG, does not induce apoptosis. (A) Western blots of cleaved caspase-3. anti-Lamin B1 and anti-GAPDH antibody were used as a senescence marker and loading control, respectively. Control samples (CON) were used for positive control for cleaved caspase-3. (B) Flow cytometry of Annexin V and PI staining from HNG-treated non-senescent and doxorubicin-induced senescent cells (C) Viability of non-senescent and replicative senescent cells treated with HNG.**
